19 **Abstract:**

20 T-cell activation induces context-specific gene expression programs that promote energy generation and  
21 biosynthesis, progression through the cell cycle and ultimately cell differentiation. The aim of this study  
22 was to apply the omni ATAC-seq method to characterize the landscape of chromatin changes induced by  
23 T-cell activation in mature naïve CD4<sup>+</sup> T-cells. Using a well-established ex vivo protocol of canonical T-  
24 cell receptor signaling, we generated genome-wide chromatin maps of naïve T-cells from pediatric donors  
25 in quiescent or recently activated states. We identified thousands of individual chromatin accessibility peaks  
26 that are associated with T-cell activation. The majority of these were localized to intronic and intergenic  
27 enhancer regions, marked by active histone modifications whilst quiescence was maintained by repressive  
28 histone marks. Regions of activation-associated gains in chromatin accessibility were enriched for well-  
29 known pioneer transcription factor motifs, and super-enhancer regions associated with distinct gene  
30 regulatory networks. These *cis*-regulatory elements together brought about distinct transcriptional  
31 signatures in activated cells including TNF $\alpha$ -NF $\kappa$ B signaling, hormone-responsive genes, inflammatory  
32 response genes and IL2-STAT5 signaling. Our data provides novel insights into the chromatin dynamics  
33 and motif usage of T-cell receptor signaling events in early life. The characterized pathways demonstrate  
34 the utility of chromatin profiling techniques applied to bio-banked samples for characterizing gene  
35 regulatory elements.

## 36 **Introduction**

37 Naïve CD4<sup>+</sup> T-cells circulate through the periphery in an actively maintained state of quiescence,  
38 ready to mount a robust immune response to pathogens. Quiescent T-cells maintain a tightly condensed  
39 chromatin architecture (Rawlings et al. 2010) and cellular program of low energy expenditure whilst  
40 surveying for cognate antigen (Wolf et al. 2020), and rapidly undergo substantial re-programming  
41 following activation, transitioning toward highly proliferative effector cells. Activation of naïve T-cells  
42 initiates rapid functional adaptations which, over the course of days, evolves into heterogenous effector  
43 fates with unique helper and regulatory functions with the potential for establishing long-lived memory  
44 phenotypes. Activated T-cells rapidly increase nutrient uptake, ramp up translational activity and switch to  
45 glycolytic pathways to provide the energy required to support cell growth(Phan et al. 2017), a massive  
46 proliferative response and the acquisition of effector functions. These adaptive changes are well understood  
47 to be underpinned by epigenetic (Tough et al. 2020), metabolic (Phan et al. 2017), transcriptional and  
48 proteomic (Wolf et al. 2020) changes.

49 At the nuclear level, T-cell receptor (TCR) signaling induces dynamic re-positioning of  
50 nucleosomes at promoters and enhancers to allow for transcriptional changes (Schones et al. 2008). These  
51 dynamic changes in the chromatin landscape enable interactions between sequence-specific transcription  
52 factors (TF) with regulatory DNA elements. Although promoters are the primary sites of transcription  
53 initiation, enhancers are major determinants of cell-specific transcriptional and physiological adaptations  
54 (Heinz et al. 2015). The assay for transposase-accessible chromatin (ATAC-seq) has gained in popularity  
55 as a method to map chromatin accessibility corresponding to TF binding sites and nucleosome positioning  
56 (Schep et al. 2015) at the genome-wide scale, due to its high resolution and low cell input, enabling ex  
57 vivo analyses (Buenrostro et al. 2013; Scharer et al. 2016). A more recent variant of the ATAC-seq  
58 method known as omni-ATAC has demonstrated advantages for removing unwanted mitochondrial reads  
59 and exhibits better performance on fixed and flash-frozen material (Corces et al. 2017). ATAC-seq  
60 integrated with TF binding motifs has proven increasingly useful for uncovering the dynamic changes in  
61 enhancer landscapes and predicting key regulatory events that bring about chromatin remodeling. The

62 dynamic remodeling of enhancer landscapes and differential TF motif usage is a characteristic of distinct  
63 T-helper subsets (Bonelli et al. 2014). The majority of data available to date has been performed on  
64 neonates (Henriksson et al. 2019), adults (Yukawa et al. 2020; Wolf et al. 2020) or murine cells  
65 (Rawlings et al. 2010; Chisolm et al. 2017; Champhekar et al. 2015; Ungerback et al. 2018), and  
66 there is a paucity of data on infants and young children. Thus, our goal was to examine the utility of omni-  
67 ATAC for characterizing chromatin dynamics and inferring gene-regulatory networks in paediatric bio-  
68 banked samples. We have previously described deficiencies in T-cell activation transcriptional networks  
69 and activation-induced regulation of DNA methylation in young infants who developed IgE-mediated food  
70 allergy (Martino et al. 2011, 2018). Studying T-cell activation responses at the molecular level has  
71 translational potential for understanding disease mechanisms and uncovering novel molecular targets.

72 In this study we isolated mature naïve T-cells from 6 healthy paediatric donors and studied  
73 chromatin dynamics in the canonical T-cell receptor signaling pathway using an identical protocol as  
74 published previously by us (Martino et al. 2018). This allowed us to analyze stimulation-dependent  
75 chromatin changes in the context of previously collected transcriptomic data. By integrating additional  
76 epigenetic data sets we undertook an epigenomic analysis of the paediatric T-cell activation response. Our  
77 data are largely consistent with previous studies, demonstrating the utility of omni-ATAC for characterizing  
78 the enhancer landscape and motif usage in paediatric bio-banked samples, as a prelude to future studies of  
79 disease mechanism.

## 80 **Results**

### 81 *Post-alignment QC*

82 We isolated mature naïve T-cells from 6 healthy infants and studied chromatin dynamics in the  
83 canonical T-cell receptor signaling pathway using an identical protocol as published previously by us  
84 (Martino et al. 2018). Naïve T-cells were activated with anti-CD3/anti-CD28 beads for 72 hours (activated  
85 nCD4T) with matched un-stimulated control condition (quiescent nCD4T). Using cell tracing dyes this  
86 protocol results in 3 – 4 distinct T-cell divisions expanding the clonal population on average by 2-fold  
87 (expansion index 2.044 [range 1.80 – 2.23], Fig. 1A). After 72 hours all cells were recovered for chromatin

88 profiling. Previous analysis demonstrated activated cells harvested in this phase represent a transitional  
 89 population of highly proliferative early effector phenotypes (Martino et al. 2018). We generated maps of  
 90 genome-wide chromatin accessibility to identify epigenomic elements that bring about the stimulation  
 91 response in resting and activated cells. Post-alignment quality control indicated high mapping efficiency  
 92 with overall alignment rates 96% or higher. Most reads were enriched at transcriptional start sites for both  
 93 activated and resting nCD4T. Fragment length distribution plots yielded high resolution of nucleosome-  
 94 free and nucleosome-occupied reads. Reads were highly enriched at universal DNase1 hypersensitivity  
 95 regions identified by the ENCODE consortium (Yue et al. 2014) and enhancer regions indicative of  
 96 regulatory DNA elements. Activated nCD4T cells exhibited a higher number of reads at promoter regions  
 97 compared with resting nCD4T (Supplemental Fig. 1).

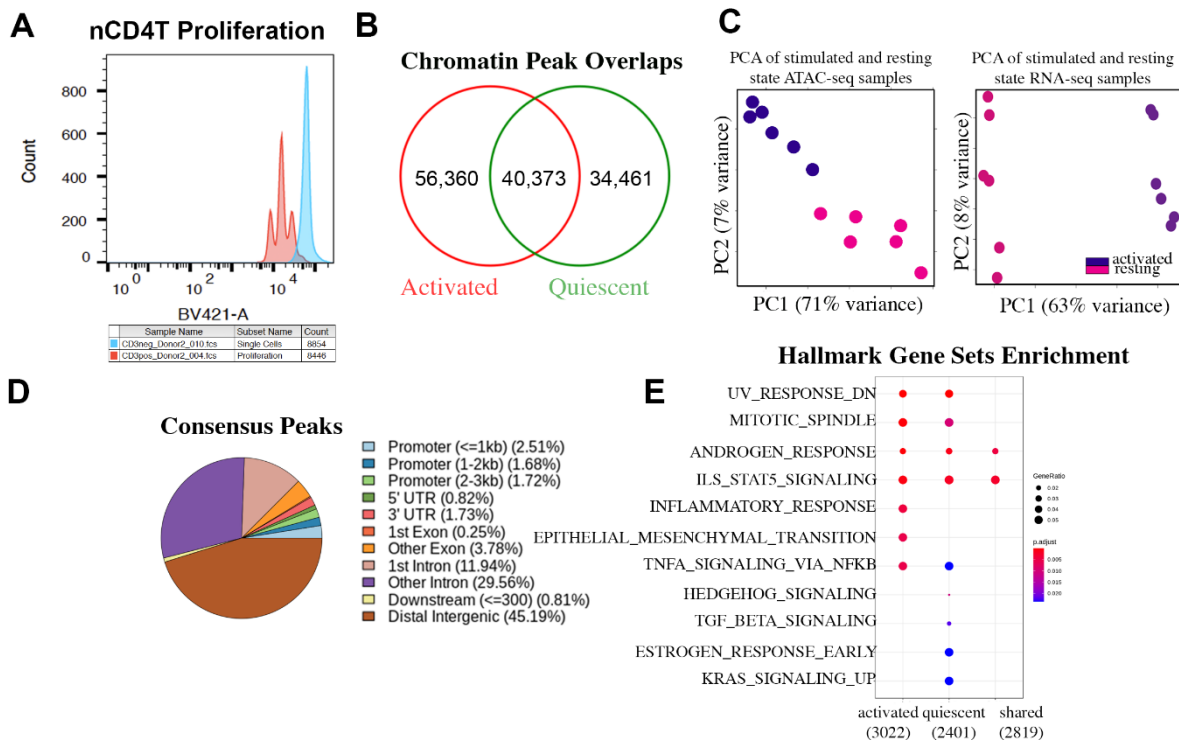

98  
 99 **Figure 1 – Activation of nCD4T induces widespread changes in chromatin accessibility. (A)** nCD4T  
 100 stained with CellTrace Violet and stimulated in culture for 3 days. Discreet peaks represent successive  
 101 generations of live cells. The unstimulated parent generation is show in blue. **(B)** Venn diagram showing

102 counts of chromatin accessibility peaks. **(C)** Principal component analysis of ATAC-seq peaks (left) and  
103 RNA-seq transcripts (right). Each sample is projected into 2D space in a way that best explains variance.  
104 **(D)** Annotation of consensus chromatin accessibility peaks to genomic regions of the hg19 genome. **(E)**  
105 Gene sets enrichment analysis of molecular signatures enriched in accessibility peaks.

106

### 107 *Open chromatin peak occupancy*

108 Compared to resting nCD4T, the genomes of activated cells were more accessible as evidenced by  
109 a larger number of open chromatin peaks. We identified 74,834 consensus peaks in quiescent nCD4T and  
110 96,733 peaks in activated nCD4T, with 40,373 common peaks (Fig. 1B). Principal component analysis of  
111 chromatin profiles and publicly available RNA-seq data from our previous study (GSE114064) revealed  
112 distinct chromatin signatures for activated and quiescent nCD4T, concomitant with distinct transcriptional  
113 programs (Fig. 1C). We annotated consensus peaks to the hg19 reference genome and examined the  
114 distribution of peaks across genomic features. The pie chart in Fig. 1D indicated that at least two-thirds of  
115 peaks were annotated to enhancer regions (distal intergenic and intronic), with only a small percentage of  
116 peaks localized to promoter regions. The latter is consistent with the typical pattern of ATAC peaks  
117 representing a mixture of different *cis*-regulatory elements such as enhancers and promoters (Thurman et  
118 al. 2012). Hypergeometric testing of peaks revealed quiescent and activated nCD4T shared many regions  
119 of open chromatin at genes in the IL2-STAT5 signaling pathway, TNFa-NFkB signal transduction genes  
120 and hormone response genes (Fig. 1E). Peaks of chromatin accessibility unique to activated cells were  
121 enriched at inflammatory response genes and genes involved in the gain of migratory capacity represented  
122 by the ‘epithelial-mesenchymal transition’ pathway. In contrast, peaks of accessibility that were unique to  
123 resting nCD4T were enriched in TGF-Beta signaling, estrogen response genes and KRAS signaling (Fig.  
124 1E).

### 125 *Differential Binding Analysis*

126 We quantified the number of differentially accessible activation-induced chromatin changes by  
127 formally testing MACS2 peaks between quiescent and activated nCD4T. Short-term activation of the T-

128 cell receptor induced substantial changes in the chromatin landscape comprising 43,269 chromatin peaks  
129 ( $q < 5\%$ ) that were differentially accessible, of which 5,607 exhibited a minimum absolute log<sub>2</sub> fold change  
130 in accessibility of  $\pm 2.0$  (Fig. 2A). Of the 5,607 differentially accessible peaks, a total of 1,089 peaks gained  
131 accessibility in activated nCD4T whilst 4,518 peaks reduced in accessibility (Fig. 2B). Chromatin regions  
132 that gained accessibility significantly ( $FDR < 0.05$ ) coincided with active chromatin marks (H3K4me1,  
133 H3K27ac) in primary T-cells, whilst peaks that reduced in accessibility upon activation coincided with  
134 repressive marks (H3K27me3 see refs in Wong) (Fig. 2B). We identified putative transcription factor  
135 binding sites within regulatory regions that gained accessibility. In total 114 transcription factor motifs were  
136 enriched (Fisher's exact  $P < 0.05$ ) within regions that gained accessibility (Fig. 2C). The most enriched motif  
137 was SPIB, a transcriptional activator that acts as a lymphoid specific enhancer to promote the development  
138 of IFN- $\gamma$  producing cells (Li et al. 2014). In addition to this novel finding, we identified several well-  
139 known factors with a previously described role in TCR signaling and differentiation (STAT5b, JUN, FOS,  
140 BACH1, NFATC4, BATF3). This analysis suggested that chromatin landscape changes associated with  
141 nCD4T activation prime for differentiation into T-effectors. In support of this, we found that regions of  
142 accessible chromatin significantly coincided with DNaseI hotspots found in differentiated T-effectors  
143 (Th17, Th1, Th2, Tregs) and were relatively depleted in hotspots unique to naïve precursors and monocytes  
144 (as a negative control (Fig. S1)). To corroborate the motif prediction analysis, we used transcription-factor  
145 ChIP-seq data available through the ENCODE consortium to test whether regions of that gain accessibility  
146 in response to activation coincide with experimentally derived ChIP-seq transcription factor peaks. There  
147 were 7 transcription factor ChIP-seq datasets in ENCODE from lymphoblastoid cells lines available for  
148 testing (BATF, BHLH, CTCF, JUND, POUF, STAT5A, TCF3), and enrichment analysis indicated all 7  
149 transcription factors signal peaks significantly (Adjusted  $P < 0.05$ ) coincided with ATAC peaks of  
150 accessibility more than expected by chance (Fig. 2D). JUND and STAT5 exhibited the greatest overlap  
151 with ATAC accessibility peaks. As expected, when we performed the same enrichment testing on ATAC  
152 peaks that lost accessibility, there was no evidence of enrichment (Adjusted  $P > 0.05$ , data not shown). We  
153 next input the list of 114 identified transcription factors into the GSEA molecular signatures database and  
154 performed gene set enrichment analysis, which revealed strong enrichment for the TNFa-NFkB signal

155 transduction pathway ( $q < 2.68^{-06}$ ), UV response ( $q < 1.92^{-02}$ ), KRAS response ( $q < 2.28^{-02}$ ) and Estrogen  
 156 response ( $q < 2.28^{-02}$ , Table S1) identified previously as enriched in ATAC peaks (Fig. 1E).

157

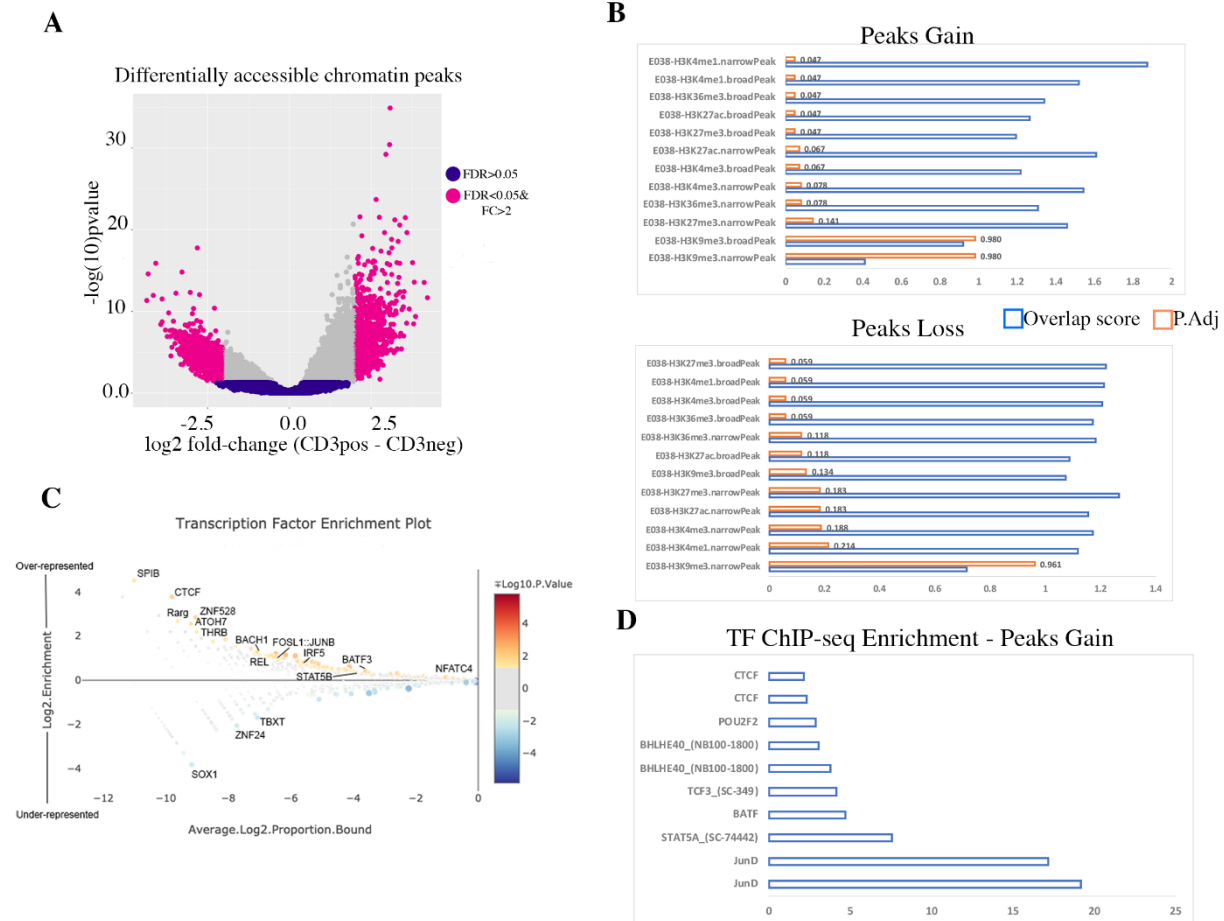

158

159 **Figure 2 – Differential accessibility of chromatin peaks in activated versus resting cells. (A)** Volcano  
 160 plot of differentially accessible peaks. Each data point represents a consensus peak. **(B)** Statistical overlap  
 161 of stimulus-dependent accessible regions with histone ChIP-seq peaks from primary T-cells. **(C)** Enriched  
 162 transcription factor motifs detected in stimulus-dependent accessible regions. **(D)** Statistical overlap of  
 163 stimulus-dependent accessible regions with transcription factor ChIP-seq peaks from ENCODE.

164

165



166

167 *Super-enhancers drive T-lymphoid specific gene regulatory networks*

168           Recent studies suggest core transcription factors can bind clusters of enhancer elements, known as  
169 super-enhancers, that can drive interconnected gene regulatory networks (Hnisz et al. 2013). We used the  
170 SEanalysis tool to query regions of chromatin accessibility gains against > 330k super-enhancers catalogued  
171 from broad H3K27Ac peaks identified from ENCODE CD4<sup>+</sup> T-cells. Activation-induced regions that  
172 gained chromatin accessibility overlapped 16 known CD4<sup>+</sup> T-cell super-enhancers (Table S2).  
173 Visualization of ATAC-peaks mapping to the regions identified by the SEanalysis tool showed clear  
174 evidence of accessibility gains across the broad region in response to stimulation with concomitant changes  
175 in gene expression of nearby transcripts (Fig. 3A and B). These super-enhancer elements formed part of a  
176 larger complex gene regulatory network. For example, a super-enhancer annotated to *ARID4B*, a subunit of  
177 a co-repressor complex, contains 9 transcription factor binding motifs that were significantly enriched  
178 (hypergeometric FDR=2x10<sup>-08</sup>) in interferon alpha/beta signaling, JAK-STAT signaling, interleukin  
179 signaling and other pathways (Fig. 3C).

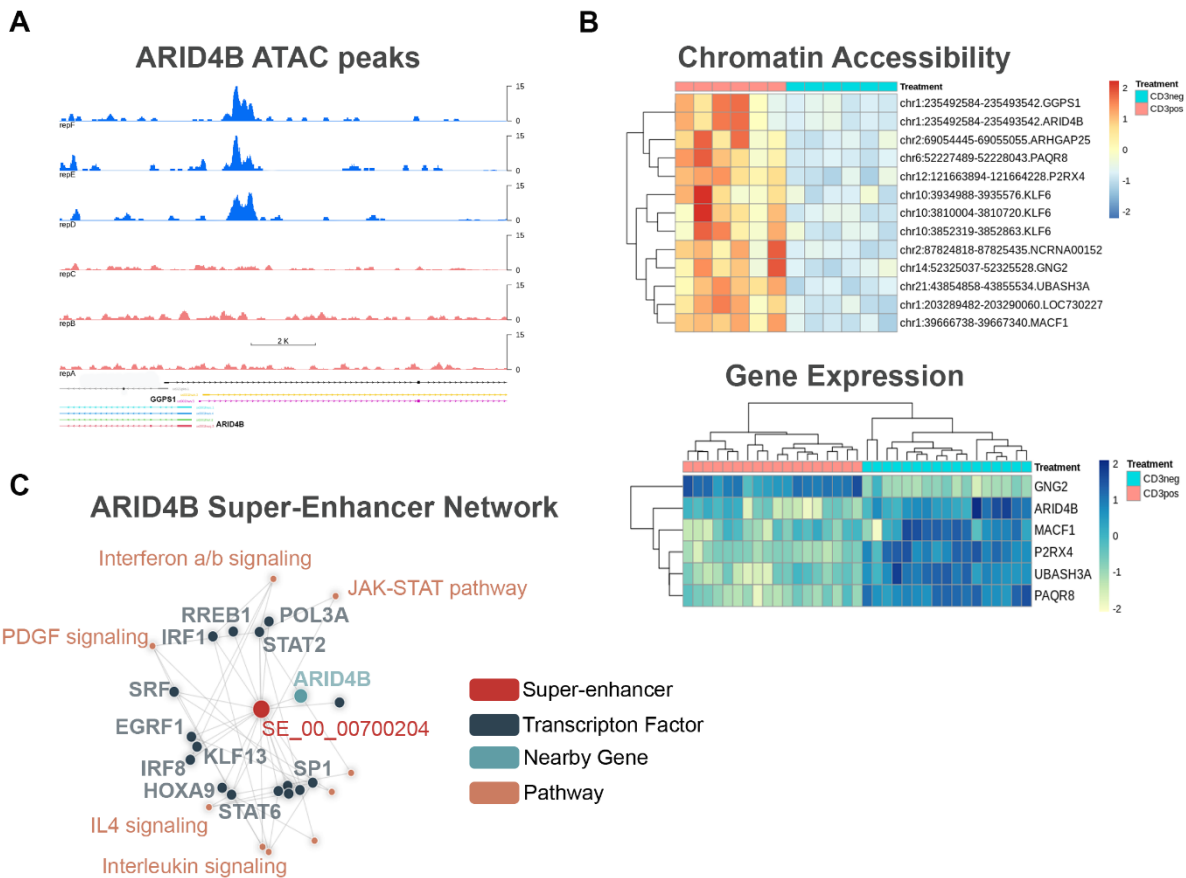

180

181 **Figure 3 – Super enhancer regions detected in stimulus-dependent accessible regions. (A)** Signal  
 182 track of ATAC-seq peaks in activated (blue) and quiescent (red) nCD4T. RefSeq transcripts are show in  
 183 the track below. **(B)** Heatmap of ATAC-seq peaks and RNA-seq transcripts. Rows represent peaks or  
 184 transcripts and columns represent samples. Cells are colored according to z-score. **(C)** ARID4B super-  
 185 enhancer network diagram showing the regulatory relationship between the identified super-enhancer  
 186 peak (SE\_00\_00700204), transcription factor motifs enriched at this peak, and their over-represented  
 187 down-stream pathways.

188

189 *Relationship to transcriptional changes*

190 We next sought to determine how differentially accessible regions associated with activation are  
 191 related to changes in gene expression. Using transcriptomic data from our previous naïve CD4T study with  
 192 harmonized laboratory stimulation protocol (GSE114064), we filtered the data set to transcripts overlapping

193 differentially accessible peaks and plotted mean gene expression profiles in activated and quiescent nCD4T.  
194 We found that average gene expression levels for transcripts located within differentially accessible regions  
195 were broadly similar across treatment conditions (Fig. 4A). Given the high level of enrichment of ATAC-  
196 seq peaks in enhancer elements rather than promoters (Fig. 1D), it stood to reason that chromatin changes  
197 would likely have more subtle *cis*- regulatory effects on gene expression that would not be obvious as a  
198 simple 1 : 1 relationship. To explore this further, we first performed a gene sets enrichment analysis on  
199 differentially accessible ATAC peaks. Stimulus-responsive regions that gained accessibility were enriched  
200 at INFLAMMATORY\_RESPONSE and genes in the IL2-STAT5 pathway, whereas those that lost  
201 accessibility were enriched in UV RESPONSE, HEDGEHOG and KRAS signaling genes (Fig. 4B). We  
202 then tested the hypothesis that expression of these pathways as a whole would differ across treatment  
203 conditions. We reasoned that IL2-STAT5 and INFLAMMATORY\_RESPONSE signatures would be  
204 enriched in activated nCD4T compared with resting nCD4T given the activation-induced gain in  
205 accessibility of genes in these pathways. Consistent with this we found strong enrichment (adj. P=0.02 IL2  
206 & adj.P=0.04 INFLAMMATORY) for these molecular signatures in activated nCD4T (Fig. 4C), but there  
207 was no evidence of enrichment in resting nCD4T (adj. P = 0.3, IL2 & INFLAMMATORY). Likewise, we  
208 found evidence of enrichment transcripts in UV response genes among quiescent nCD4T only but not  
209 activated nCD4 T (adj. P=0.03, Fig. 4C).

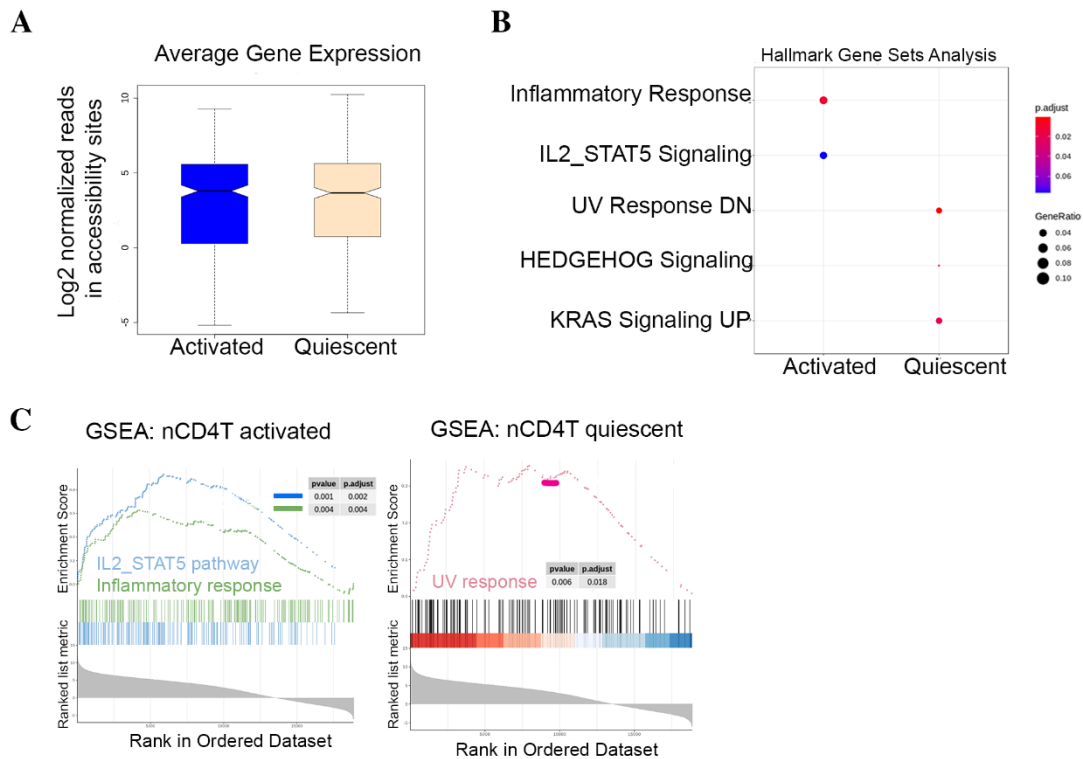

210

211 **Figure 4 – Functional analysis of gene expression at stimulus-dependent accessible regions. (A)**

212 Boxplot of expressed genes in accessibility sites shows no evidence of global changes in transcriptional

213 output. **(B)** Predicted enriched molecular signatures at differentially accessible peaks (FDR < 0.05 and

214 log<sub>2</sub>FC +/- 2). **(C)** Genesets enrichment scores of expressed transcripts validating predicted molecular

215 signatures from ATAC-seq peaks. Top panels show overall enrichment score for the pathway tested. The

216 middle panel tick marks show where the members of the gene set appear in the ranked list of genes. The

217 bottom panel shows the value of the gene's correlation with phenotype.

218

219 Collectively, this analysis suggests that stimulus-dependent chromatin changes drive a broader gene

220 regulatory network comprising both direct and indirect interactions. To illustrate the latter point we

221 identified differentially expressed genes by comparing the transcriptomes of quiescent versus activated

222 nCD4T. In total, 3876 genes were differentially expressed (FDR < 0.05 & log<sub>2</sub>FC > 2). We performed

223 ontology enrichment analysis on the list of differentially expressed genes (DEGs) and differentially

224 accessible regions (DARs). The circos plot in Fig. 5A show the direct overlap between the list of DEGs and  
225 DARs was minimal, however functional overlap based on the same gene/region falling into the same  
226 ontology term was far more substantial (Fig. 5B). Both differentially accessible regions and genes were  
227 enriched among key pathways of T-cell activation including E2F pathway, TNFA\_NFKB and IL2\_STAT5  
228 signaling, however there were many additional ontologies enriched among differentially expressed genes  
229 related to mitotic (MYC targets) and metabolic (MTORC1, Oxidative Phosphorylation) pathways among  
230 others.

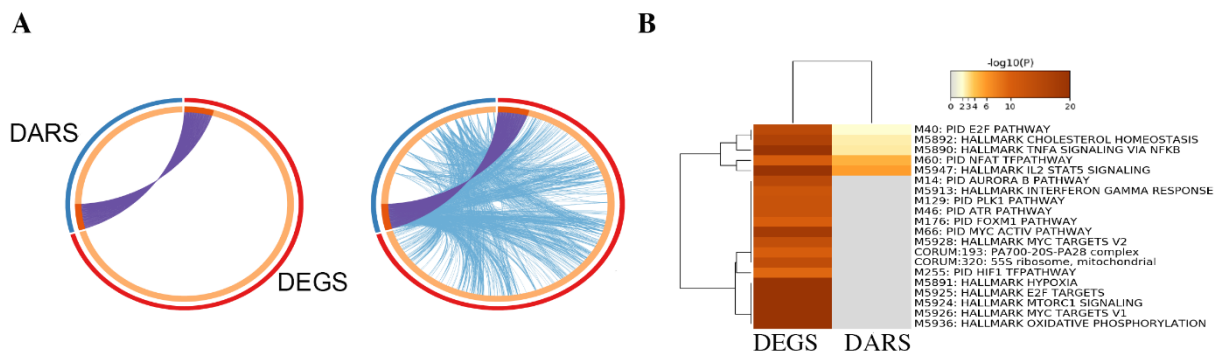

231  
232 **Figure 5 – Direct and indirect relationships between stimulus-responsive chromatin peaks and genes.**  
233 **(A)** Circos plot of differentially accessible regions (DARS: FDR<0.05 & log<sub>2</sub>FC +/-2) and differentially  
234 expressed genes (DEGS: FDR<0.05 & log<sub>2</sub>C+/-2). Each gene in both lists is represented on the inner arc.  
235 Dark orange colour joined by purple chord represents genes that appear in both lists and light orange colour  
236 are unique genes. Blue lines link the different genes where they fall into the same statistically enriched  
237 ontology term. **(B)** Statistically enriched terms (GO/KEGG terms, canonical pathways, etc.) in chromatin  
238 regions and differentially expressed genes. The heatmap cells are colored by their p-values, white cells  
239 indicate the lack of enrichment for that term in the corresponding gene list.

240

## 241 Discussion

242 T-cell activation induces global remodeling of chromatin accessibility in an orderly and timely manner.  
243 These epigenetic changes are coincidental with specific gene regulatory networks that bring about changes

244 in cellular metabolism, proliferative capacity and effector function(Bonelli et al. 2014). In this study we  
245 compared genome-wide chromatin accessibility maps between quiescent and activated naïve CD4+ T-cells.  
246 Consistent with previous studies (Rawlings et al. 2010) we found that TCR signaling induces wide-spread  
247 de-condensation of chromatin, as evidence by substantially higher (~22,000) open chromatin peaks detected  
248 in activated cells. The transition to proliferative early effectors appears highly dependent on chromatin  
249 remodeling and less so for other epigenetic changes. Our previous genome-wide studies of DNA  
250 methylation dynamics in CD4+ T-cell activation revealed no substantial changes in methylation dynamics  
251 at 48 hours post-activation (Martino et al. 2012) and 558 CpG dinucleotides that were stimulus-responsive  
252 at 72 hours(Martino et al. 2018). This is in contrast to the 43,000 chromatin accessibility changes we  
253 detected at the genome-wide level, around 5,000 of which exhibited very large changes. Similarly,  
254 Rawlings et al also reported that TCR-induced nuclear de-condensation was not dependent on CpG  
255 methylation, nor any substantial net changes in global histone modifications (Rawlings et al. 2010).  
256 Chromatin remodeling is therefore a highly dynamic epigenetic mediator of the T-cell activation response.

257 Chromatin accessibility modulates DNA interactions with transcription factors and the  
258 transcriptional machinery. Stimulation associated regions that gained accessibility in our data set were  
259 marked with active histone modifications, whilst regions that condense overlapped repressive histone  
260 modifications that may serve to suppress alternative cell fates and lineages. In our data set we identified  
261 strong enrichment for pioneering transcription factor motifs SPI-1 (also known as PU.1), CTCF and BATF  
262 in regions that gain accessibility. PU.1 is a well-established pioneer factor in early T-lineage commitment  
263 that binds gene enhancers (Ungerback et al. 2018), supports proliferation and restrains alternative  
264 lineages (Champhekar et al. 2015). Binding of SPI-1 can induce chromatin opening and maintain  
265 accessibility at target sites. The CTCF DNA binding zinc finger transcription factor plays a spatially  
266 organizing role in the genome and promotes precise regulation of developmental gene expression programs.  
267 In CD4-T cells, changes in CTCF binding patterns are associated with interleukin-2 sensitive metabolic  
268 changes (Chisolm et al. 2017). The recruitment of CTCF in T-cells is known to be BATF-dependent, and  
269 we detected enrichment for BATF motifs in regions that gain accessibility on activation (Phan et al. 2017).

270 We also found enrichment of AP-1 family binding motifs (Fos, Jun) which are known pioneer factors that  
271 are dramatically up-regulated in response to T-cell activation (Yukawa et al. 2020). Both AP-1 and NFAT  
272 (detected in our dataset) are known to play a role in super-enhancer formation in response to T-cell  
273 activation (Yukawa et al. 2020). Our analysis identified 13 super-enhancers that were associated with  
274 transcriptional changes. Collectively these data characterize the motif usage that bring about the activity  
275 change into early effector ‘Th0’ progeny cells. It also highlights the power of the omni-ATAC technique  
276 for identifying key regulatory proteins for experimental follow-up with specific transcription-factor ChIP.

277 The relationship between chromatin landscape dynamics and transcriptional state changes was  
278 complex in our interpretation. We found that stimulus-dependent chromatin accessibility changes were  
279 enriched in IL2-STAT5 signaling and inflammatory response genes, and these molecular signatures were  
280 significantly enriched in activated cells. These are extremely well characterized transcriptional pathways in  
281 T-lymphocyte responses (Ross and Cantrell 2018), thus validating the utility of the omni-ATAC  
282 technique for deciphering the underlying gene regulatory networks associated with chromatin state changes.  
283 It is noteworthy that we did not identify obvious direct relationships between chromatin changes and gene  
284 expression, which may be expected given the majority of chromatin remodeling occurred at intronic or  
285 distal intergenic sites, suggesting more complex regulation of gene expression. A recent proteomic study  
286 has demonstrated that naïve T-cells maintain a reservoir of glycolytic enzymes and un-translated mRNAs  
287 that are immediately mobilized in response to activation, allowing naïve cells to kick-start glycolysis and  
288 protein synthesis (Wolf et al. 2020). Thus, chromatin responses account for only a portion of the T-cell  
289 activation transcriptional response and comprise one of several regulatory mechanisms that underpin T-cell  
290 responses. An alternative explanation and potential limitation are that directly relationships were difficult  
291 to infer as the gene expression data were from another experiment and therefore may have captured the  
292 same biological snapshot albeit at a slightly different time. Although the ex vivo protocols were  
293 harmonized, we cannot rule out experimental variation as posing challenges for inferring direct  
294 relationships.

295           The strengths of this study include utilizing a strategy to study canonical TCR signaling by pre-  
296    sorting naïve CD4<sup>+</sup> T-cells, resulting in a pure and homogenous population. This circumvents difficulties  
297    in interpretation posed by co-culture with antigen-presenting cells as chromatin dynamics are likely  
298    influenced by secreted factors and cell to cell interactions from accessory cells. By focusing on naïve CD4<sup>+</sup>  
299    cells rather than total CD4<sup>+</sup> cells, which are a mixed population, we avoided confounding due to cellular  
300    heterogeneity. We utilized existing RNA-seq data and integrating ChIP-seq and DNaseI-seq datasets from  
301    the ENCODE project. These integrations mutually validate the reliability of the ATAC-seq data and aid in  
302    biological interpretation (Yan et al. 2020). Caveats include studying only one time-point in the T-cell  
303    activation response, and lack of functional data on cytokine responses and cell surface marker changes.  
304    This was deemed outside the scope of the current study, as we have characterized these responses in  
305    previous studies (Martino et al. 2018) and our focus in the current study was on the chromatin response.  
306    We also identified areas of improvement in the omni-ATAC protocol, namely reducing the number of PCR  
307    cycles to reduce duplication rates. We were not able to perform a motif foot printing analysis as we did not  
308    have sufficient depth of sequencing to accurately call footprints. Overall, this study characterized the  
309    chromatin dynamics that bring about the ‘Th0’ early effector progeny and their respective transcriptional  
310    state. Importantly, we have done this ex vivo on infant biospecimens demonstrating an approach amenable  
311    to paediatric cohort studies. Our future studies will build on the methodology here to study the epigenetic  
312    regulation of T-cell activation in disease phenotypes such as allergy and autoimmunity.

313

## 314 **Materials and Methods**

### 315 **Subject selection**

316    Subjects were recruited through Princess Margaret Hospital in Perth, Western Australia as part of a  
317    community-based program of allergy prevention. All subjects used in this study underwent prospective  
318    clinical assessments at 1, 2.5 and 5 years of age, including phenotyping for allergic outcomes and general  
319    health and donated venous blood for cryopreservation according to institutional ethics committees.  
320    Inclusion criteria for selecting biospecimens for this study included equal numbers of males (n=3) and



321 females (n=3), subjects were 1-year of age at time of biospecimen collection, subjects did not receive any  
322 interventions, subjects had more than 1 vial of cryopreserved peripheral blood mononuclear cells (PBMC)  
323 in the biobank. Exclusion criteria included any congenital malformations, any primary immune deficiency  
324 or clinically significant illness that would affect normal hematopoietic development. General characteristics  
325 of the cohort are provided in Table S3.

326

### 327 **Isolation, activation and expansion of naïve CD4+ T-cells**

328 Cryopreserved PBMC were thawed in RPMI media (Gibco) supplemented with 10% fetal bovine serum  
329 (FBS), Pen-Strep and benzonase (25U/mL) maintained in a 37-degree water bath. After thawing, cells were  
330 washed twice, counted and viability checked by trypan blue. Cell recoveries ranged from 8 – 20 million  
331 PBMC with viabilities higher than 90%. Naïve CD4+ T-cells (CD3+CD4+CD45RA+CD45RO-) were  
332 purified from PBMC using the EasySep Human CD4+ T-cell Isolation Kit (Stemcell Technologies) to  
333 >95% purity according to manufacturer's instructions. Yield of naïve T-cells ranged from 1 – 2.5 million  
334 cells. Naïve CD4+T cells were pre-labelled with 5mM CellTrace Violet division tracking dye (Thermo  
335 Fisher) according to manufacturer's instructions and seeded into 96-well polystyrene plates at 80,000 cells  
336 per well in RPMI media with 10% FBS, Pen-Strep and human recombinant interleukin-2 (210U/mL, R&D  
337 systems). For activation, 2uL of Human T-cell Activator Dynabeads CD3/CD28 (Life Tech) was added to  
338 each well reserved for activation, with an equal number of un-activated wells. Cells were incubated for 72  
339 hours at 37 degrees and 5% CO2 before harvesting. At culture end-point, cells were thoroughly  
340 resuspended, and beads were removed with replicate wells combined into a single tube for ATAC-seq. A  
341 proportion of replicate wells was reserved for proliferation analysis on the BD Fortessa cytometer with  
342 405nm excitation and 450/40 bandpass emission filter.

343

### 344 **Omni ATAC-seq**

345 We employed the omni-ATAC method of Corces. 80,000 viable naïve T-cells were pelleted and lysed in  
346 lysis buffer containing 10mM Tris-HCl, 10mM NaCl, 3mM MgCL<sub>2</sub>, 0.1% NP40, 0.1% Tween20 and

347 0.01% Digitonin for 3 minutes on ice. Cells were washed with 1mL of cold wash buffer (lysis buffer without  
348 NP40 or Digitonin) and nuclei were pelleted in a centrifuge at 800 RCF for 10 min at 4 degrees. Pelleted  
349 nuclei were transposed with Tn5 transposase (Illumina) in TD buffer (Illumina) supplemented with  
350 Digitonin (0.1%) and Tween20 (0.01%) for 30min at 37 degrees. Transposed DNA was purified using  
351 Zymo DNA Clean and Concentrator-5 Kit (Zymo research) according to manufacturer's instruction. DNA  
352 recoveries were measured on the Qubit fluorometer (Invitrogen). Library amplification was performed  
353 using Nextera DNA library prep kit with Nextera Index Kit (Illumina) as per manufacturers instruction.  
354 The number of PCR amplification cycles was determined by qRT-PCR using Quantifast SYBR Green PCR  
355 mastermix (Qiagen) and Nextera Primer I5 and I7 Indexes for 5 cycles. The number of additional cycles  
356 was determined by a second round of qPCR performed on partially amplified libraries based on the CT  
357 value reading taken at 1/3 the fluorescence curve. Two step size selection was performed using AMPure  
358 XP beads (Beckman Coulter). Libraries were run on the LabChip GXII fragment analyser and quantitated  
359 on the Qubit fluorometer. Libraries were shipped on ice to Novogene (China) for pooling and sequencing  
360 on 2 lanes of the Illumina HiSeq at 2x150 paired end reads to generate 50 million reads per sample.

361

## 362 **Bioinformatics**

363 Raw fastq files were analysed using the Multiqc program to generate QC metrics and were processed using  
364 the ENCODE official ATAC-seq pipeline version 1.4 specified [here](#). Briefly, adapters detection and  
365 trimming were performed using cutadapt (1.91.) and trimmed reads were aligned using the Bowtie2 (2.2.6)  
366 aligner. Mapping statistics were generated with SAMtools (1.7) and SAMstats (0.2.1). Post-alignment  
367 filtering of duplicates was performed using Picard (1.126) and bedtools (2.26). Aligned reads were shifted  
368 +4 bp for the forward strand and -5 bp for the reverse strand. Fragment length statistics were generated  
369 using Picard (1.126). Peak calling was conducted using MACSv2 (2.1.0) and blacklisted regions were  
370 filtered using bedtools (2.26). Irreproducibility analysis was performed on pseudoreplicates using  
371 phantompeakqualtools (1.2.1) and IDR (2.0.4) on 300K MACS2 peaks using a threshold of 0.05. Reads  
372 were annotated to ENCODE regions using python scripts and bedtools (2.26).

373

## 374 **Data analysis**

375 All data analyses were conducted in R version 4.0.2. MAC2 peaks were coerced to a peakset object using  
376 Diffbind (2.16). Consensus peaksets were derived for activated and quiescent cells defined by presence in  
377 more than half the replicates in each group. Peaks were annotated to the hg19 genome using ChIPseeker  
378 (1.24). Enrichment analysis of peaks in hallmark genesets was conducted using the clusterProfiler package  
379 (3.16). Normalized read counts for consensus peaks were computed for each sample using Diffbind, and  
380 differential accessibility between activated and quiescent T-cells was determined using a matched pairs t-  
381 test using the edgeR package (3.30). Peaks were declared differentially accessible at the genome-wide level  
382 of false discovery rate adjusted P-value  $< 0.05$  and those exhibiting a log<sub>2</sub> fold change of  $\pm 2$  or greater  
383 were further analysed. Peak signal tracks were generated using the rtracklayer package (1.48). Motif  
384 detection analysis was conducted using the CIIDER tool (Gearing et al. 2019) using the JASPAR core  
385 vertebrates 2020 reference database using default parameters. Detection of super enhancers was performed  
386 using the SEanalysis tool (Qian et al. 2019) to query accessibility peaks overlapping  $> 330k$  super  
387 enhancers across 542 cells/tissues annotated in the SEdb database, in Genomic Region Annotation mode  
388 using 'closet active' gene-SE linking strategy. We restricted the analysis to blood tissue only, and further  
389 filtered the results to only primary CD4<sup>+</sup> cells. Motif occurrences in constituent enhancers of super  
390 enhancers were identified using FIMO (find individual motif occurrences) at p-value threshold of  $10^{-7}$  and  
391 enriched pathways were identified using hypergeometric testing at a threshold of FDR-adjusted P-value  
392  $< 0.05$ . We used the GSuite hyperbrowser program (Simovski et al. 2017) to perform a statistical analysis  
393 of over-representation of accessibility peaks with ENCODE datasets. To determine which ENCODE  
394 datasets exhibit the strongest similarity to accessibility regions we used the Forbes coefficient to obtain  
395 rankings of tracks, and Monte Carlo simulation to provide a statistical assessment of the robustness of the  
396 rankings of data tracks, using a null model derived from randomizing the positions of the accessibility  
397 regions relative to query tracks. All p-values were adjusted for multiple testing using the Benjamini-  
398 Hochberg method. RNAseq data from GSE114064 were downloaded for a subset of age-matched healthy  
399 control infants and TMM normalized count data were voom transformed using limma (3.44.3).  
400 Differentially expressed genes were declared by comparing transcript expression levels between activated

401 and quiescent T-cells using a matched-pairs t-test (limma) at the genome-wide level of FDR-adjusted P-  
402 value < 0.05 and log<sub>2</sub> fold change +/- 2 or greater. Overlaps between differentially accessible regions and  
403 genes as well as pathways enrichment analysis were computed using the metascape tool under default  
404 settings (Zhou et al. 2019). Statistically enriched terms (GO/KEGG terms, canonical pathways, etc.) in  
405 chromatin regions and differentially expressed genes were identified and accumulative hypergeometric p-  
406 values and enrichment factors were calculated and used for filtering. Remaining significant terms were  
407 then hierarchically clustered into a tree based on Kappa-statistical similarities among their gene  
408 memberships. Then 0.3 kappa score was applied as the threshold to cast the tree into term clusters. We  
409 selected the term with the best p-value within each cluster as its representative term and display them in a  
410 heatmap.

411

#### 412 **Data Access**

413 The data sets generated for this study are deposited in the Gene Expression Omnibus Repository under  
414 accession number GSEXXXX

415

#### 416 **Acknowledgements**

417 We wish to acknowledge the contribution of Dr Debbie Palmer, Professor Susan Prescott and the Childhood  
418 Allergy and Immunology Research team for their contribution to collection of data and samples pertaining  
419 to the cohort studied here.

420

#### 421 **Footnotes**

422 Supplemental material is available for this article.

423

424

425

426

427

428 **References**

429

430 Bonelli M, Shih H-Y, Hirahara K, Singelton K, Laurence A, Poholek A, Hand T, Mikami Y,  
431 Vahedi G, Kanno Y, et al. 2014. Current Topics in Microbiology and Immunology. *Curr Top*  
432 *Microbiol* **381**: 279–326.

433 Buenrostro JD, Giresi PG, Zaba LC, Chang HY, Greenleaf WJ. 2013. Transposition of native  
434 chromatin for fast and sensitive epigenomic profiling of open chromatin, DNA-binding  
435 proteins and nucleosome position. *Nat Methods* **10**: 1213–1218.

436 Champhekar A, Damle SS, Freedman G, Carotta S, Nutt SL, Rothenberg EV. 2015. Regulation  
437 of early T-lineage gene expression and developmental progression by the progenitor cell  
438 transcription factor PU.1. *Gene Dev* **29**: 832–48.

439 Chisolm DA, Savic D, Moore AJ, Ballesteros-Tato A, León B, Crossman DK, Murre C, Myers  
440 RM, Weinmann AS. 2017. CCCTC-Binding Factor Translates Interleukin 2- and  $\alpha$ -  
441 Ketoglutarate-Sensitive Metabolic Changes in T Cells into Context-Dependent Gene  
442 Programs. *Immunity* **47**: 251-267.e7.

443 Corces MR, Trevino AE, Hamilton EG, Greenside PG, Sinnott-Armstrong NA, Vesuna S,  
444 Satpathy AT, Rubin AJ, Montine KS, Wu B, et al. 2017. An improved ATAC-seq protocol  
445 reduces background and enables interrogation of frozen tissues. *Nat Methods* **14**: 959–962.

446 Gearing LJ, Cumming HE, Chapman R, Finkel AM, Woodhouse IB, Luu K, Gould JA, Forster  
447 SC, Hertzog PJ. 2019. CiiiDER: A tool for predicting and analysing transcription factor  
448 binding sites. *Plos One* **14**: e0215495.

449 Heinz S, Romanoski CE, Benner C, Glass CK. 2015. The selection and function of cell type-  
450 specific enhancers. *Nat Rev Mol Cell Biology* **16**: 144–54.

451 Henriksson J, Chen X, Gomes T, Ullah U, Meyer KB, Miragaia R, Duddy G, Pramanik J, Yusa  
452 K, Lahesmaa R, et al. 2019. Genome-wide CRISPR Screens in T Helper Cells Reveal  
453 Pervasive Crosstalk between Activation and Differentiation. *Cell* **176**: 882-896.e18.

454 Hnisz D, Abraham BJ, Lee TI, Lau A, Saint-André V, Sigova AA, Hoke HA, Young RA. 2013.  
455 Super-Enhancers in the Control of Cell Identity and Disease. *Cell* **155**: 934–947.

456 Li P, Spolski R, Liao W, Leonard WJ. 2014. Complex interactions of transcription factors in  
457 mediating cytokine biology in T cells. *Immunol Rev* **261**: 141–56.

458 Martino D, Maksimovic J, Joo J-H, Prescott SL, Saffery R. 2012. Genome-scale profiling reveals  
459 a subset of genes regulated by DNA methylation that program somatic T-cell phenotypes in  
460 humans. *Genes Immun* **13**: 388–398.

461 Martino D, Neeland M, Dang T, Cobb J, Ellis J, Barnett A, Tang M, Vuillermin P, Allen K,  
462 Saffery R. 2018. Epigenetic dysregulation of naive CD4<sup>+</sup> T-cell activation genes in childhood  
463 food allergy. *Nat Commun* **9**: 3308.

- 464 Martino DJ, Bosco A, McKenna KL, Hollams E, Mok D, Holt PG, Prescott SL. 2011. T-cell  
465 activation genes differentially expressed at birth in CD4+ T-cells from children who develop  
466 IgE food allergy: Microarray gene profiling in children with IgE-mediated food allergy.  
467 *Allergy* **67**: 191–200.
- 468 Phan AT, Goldrath AW, Glass CK. 2017. Metabolic and Epigenetic Coordination of T Cell and  
469 Macrophage Immunity. *Immunity* **46**: 714–729.
- 470 Qian F-C, Li X-C, Guo J-C, Zhao J-M, Li Y-Y, Tang Z-D, Zhou L-W, Zhang J, Bai X-F, Jiang  
471 Y, et al. 2019. SEanalysis: a web tool for super-enhancer associated regulatory analysis.  
472 *Nucleic Acids Res* **47**: W248–W255.
- 473 Rawlings JS, Gatzka M, Thomas PG, Ihle JN. 2010. Chromatin condensation via the condensin  
474 II complex is required for peripheral T-cell quiescence: Chromatin condensation is required  
475 for quiescence. *Embo J* **30**: 263–276.
- 476 Ross SH, Cantrell DA. 2018. Signaling and Function of Interleukin-2 in T Lymphocytes. *Annu*  
477 *Rev Immunol* **36**: 411–433.
- 478 Scharer CD, Blalock EL, Barwick BG, Haines RR, Wei C, Sanz I, Boss JM. 2016. ATAC-seq on  
479 biobanked specimens defines a unique chromatin accessibility structure in naïve SLE B cells.  
480 *Sci Rep-uk* **6**: 27030.
- 481 Schep AN, Buenrostro JD, Denny SK, Schwartz K, Sherlock G, Greenleaf WJ. 2015. Structured  
482 nucleosome fingerprints enable high-resolution mapping of chromatin architecture within  
483 regulatory regions. *Genome Res* **25**: 1757–1770.
- 484 Schones DE, Cui K, Cuddapah S, Roh T-Y, Barski A, Wang Z, Wei G, Zhao K. 2008. Dynamic  
485 Regulation of Nucleosome Positioning in the Human Genome. *Cell* **132**: 887–898.
- 486 Simovski B, Vodák D, Gundersen S, Domanska D, Azab A, Holden L, Holden M, Grytten I,  
487 Rand K, Drabløs F, et al. 2017. GSuite HyperBrowser: integrative analysis of dataset  
488 collections across the genome and epigenome. *Gigascience* **6**: gix032.
- 489 Thurman RE, Rynes E, Humbert R, Vierstra J, Maurano MT, Haugen E, Sheffield NC,  
490 Stergachis AB, Wang H, Vernet B, et al. 2012. The accessible chromatin landscape of the  
491 human genome. *Nature* **489**: 75–82.
- 492 Tough DF, Rioja I, Modis LK, Prinjha RK. 2020. Epigenetic Regulation of T Cell Memory:  
493 Recalling Therapeutic Implications. *Trends Immunol* **41**: 29–45.
- 494 Ungerbäck J, Hosokawa H, Wang X, Strid T, Williams BA, Sigvardsson M, Rothenberg EV.  
495 2018. Pioneering, chromatin remodeling, and epigenetic constraint in early T-cell gene  
496 regulation by SPI1 (PU.1). *Genome Res* **28**: 1508–1519.
- 497 Wolf T, Jin W, Zoppi G, Vogel IA, Akhmedov M, Bleck CKE, Beltraminelli T, Rieckmann JC,  
498 Ramirez NJ, Benevento M, et al. 2020. Dynamics in protein translation sustaining T cell  
499 preparedness. *Nat Immunol* 1–11.

- 500 Yan F, Powell DR, Curtis DJ, Wong NC. 2020. From reads to insight: a hitchhiker’s guide to  
501 ATAC-seq data analysis. *Genome Biol* **21**: 22.
- 502 Yue F, Cheng Y, Breschi A, Vierstra J, Wu W, Ryba T, Sandstrom R, Ma Z, Davis C, Pope BD,  
503 et al. 2014. A comparative encyclopedia of DNA elements in the mouse genome. *Nature* **515**:  
504 355–64.
- 505 Yukawa M, Jagannathan S, Vallabh S, Kartashov AV, Chen X, Weirauch MT, Barski A. 2020.  
506 AP-1 activity induced by co-stimulation is required for chromatin opening during T cell  
507 activationAP-1 controls T cell chromatin remodeling. *J Exp Medicine* **217**.
- 508 Zhou Y, Zhou B, Pache L, Chang M, Khodabakhshi AH, Tanaseichuk O, Benner C, Chanda SK.  
509 2019. Metascape provides a biologist-oriented resource for the analysis of systems-level  
510 datasets. *Nat Commun* **10**: 1523.
- 511
